# Supplementary material for: Zika Virus Strains Potentially Display Different Infectious Profiles in Human Neural Cells
Source: PubMed Central journal article supplement — eBioMedicine. 2016 Sep 21;12:161–9. doi: 10.1016/j.ebiom.2016.09.020 (PMC5078617; doi:10.1016/j.ebiom.2016.09.020), 2016-09-21
Supplement: mmc1.pdf [file mmc1.pdf]

Supplemental Information

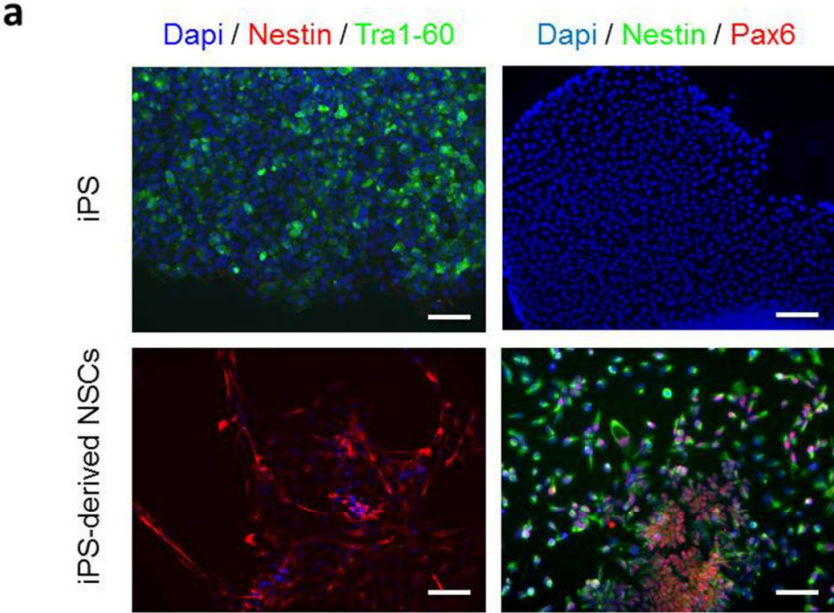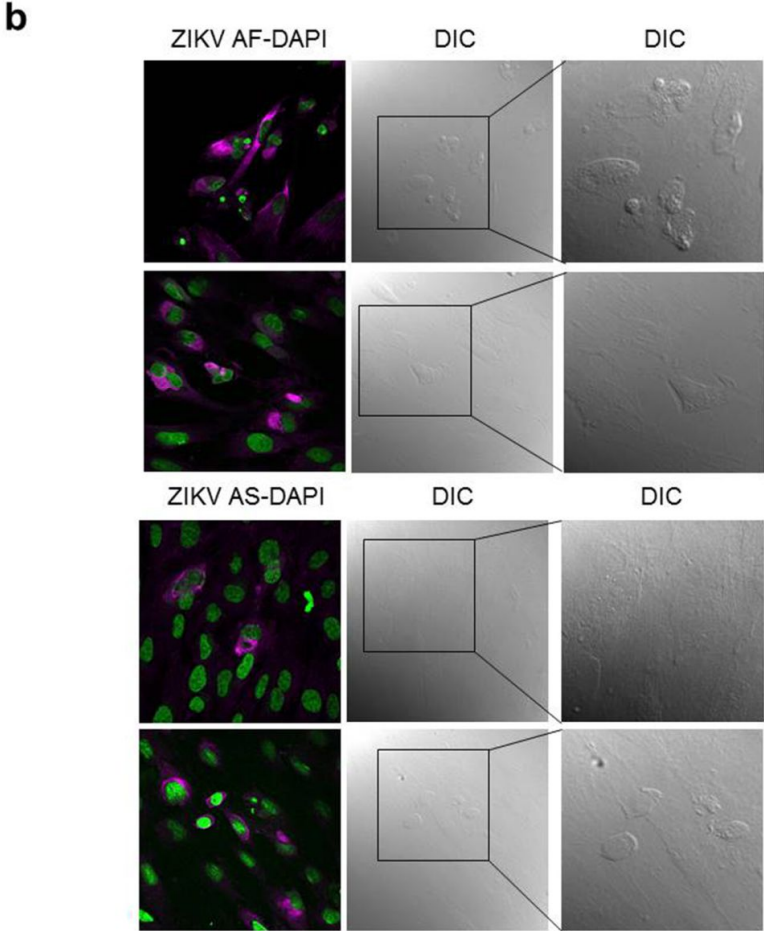

Supplemental Figure 1:

(A) IF studies showing iPSCs expressing pluripotency markers TRA1-60 and iPSC-derived NSCs expressing neural progenitor markers Nestin and Pax6. Scale bar 100  $\mu\text{m}$ .

(B) Transmitted light image of ZIKV AF and AS-infected NSCs at day 4 post infection show scarcely ECPs (zoom panels, black box are shown in the right). The virus is labeled using a pan-flavivirus antibody (magenta) and nuclei by DAPI (false colored in green). Scale bar = 10  $\mu\text{m}$ .

| Genes    |          |        |        |
|----------|----------|--------|--------|
| AIM1     | CYLD     | IL1B   | MYD88  |
| APOBEC3G | TKFC     | CXCL8  | NFKB1  |
| ATG5     | DDX3X    | IRAK1  | NLRP3  |
| AZI2     | DDX58    | IRF7   | OAS2   |
| CARD9    | DHX58    | ISG15  | PIN1   |
| CASP1    | FADD     | JUN    | PYCARD |
| CASP8    | FOS      | MAP2K1 | RELA   |
| CCL5     | HSP90AA1 | MAP2K3 | RIPK1  |
| CD40     | IFIH1    | MAP3K1 | SPP1   |
| CD86     | IFNA1    | MAP3K7 | STAT1  |
| CHUK     | IFNA2    | MAPK1  | TLR3   |
| CTSB     | IFNAR1   | MAPK14 | TNF    |
| CTSL     | IFNB1    | MAPK3  | TRAF3  |
| CTSS     | IKBKB    | MAPK8  | TRAF6  |
| CXCL10   | IL12A    | MAVS   | TRIM25 |
| CXCL11   | IL12B    | MX1    |        |

### Supplemental Table

List of genes analyzed in this study.
